# Supplementary material for: Tornado-Scale Vortices in the Tropical Cyclone Boundary Layer: Numerical Simulation with WRF-LES Framework
Source: Copernicus journal article supplement (doi:10.5194/acp-2018-787), 2018-10-08
Supplement: Supplementary file [file RC1.pdf › RC1.pdf]

### Reply to Referee #3

Thank you very much for your valuable comments. In the future we will examine the sustained wind speed by using different criteria to figure out which averaging time is more adequate to represent maximum sustained wind in a TC.

The description of grid resolution and time step in our experiment are listed as following:

| Domain | Grid resolution | Time step |
|--------|-----------------|-----------|
| D1     | 27km            | 30.00s    |
| D2     | 9km             | 10.00s    |
| D3     | 3km             | 3.33s     |
| D4     | 1km             | 1.11s     |
| D5     | 333.3m          | 0.37s     |
| D6     | 111.1m          | 0.12s     |
| D7     | 37.03m          | 0.04s     |

Minor corrections:

1. P5, line 108, “When the horizontal resolution was decreased... should read “When the horizontal resolution was increased...”

2. P9, line 198, “...wind size...” should be “...window size...”

We have revised the manuscript and the above errors have been corrected.
